# Supplementary material for: Cytokine-mediated activation of human ex vivo-expanded Vγ9Vδ2 T cells
Source: PubMed Central journal article supplement (PMC5542238; doi:10.18632/oncotarget.17498), 2017-04-28
Supplement: oncotarget-08-45928-s001.pdf [file oncotarget-08-45928-s001.pdf]

# Cytokine-mediated activation of human ex vivo-expanded V $\gamma$ 9V $\delta$ 2 T cells

## SUPPLEMENTARY FIGURES

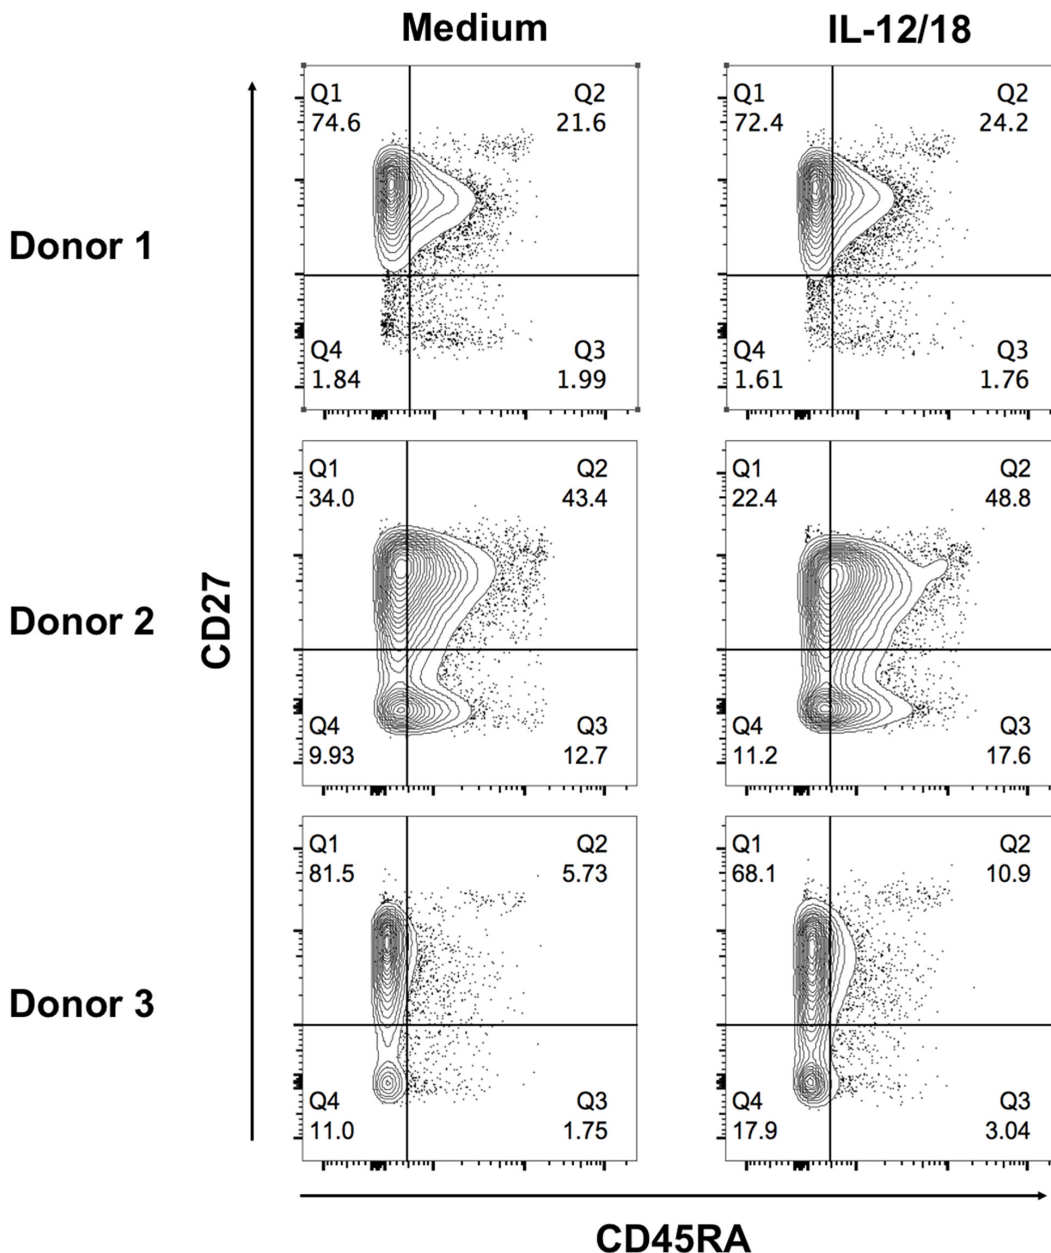

**Supplementary Figure 1: Freshly isolated V $\gamma$ 9V $\delta$ 2 T cells consist of antigen experienced and unexperienced cells.** V $\gamma$ 9V $\delta$ 2 T cells were isolated from PBMC prepared from three donors. Cells were treated or untreated with IL-12/IL-18 for 16 h. Cell surface expression of CD27 and CD45RA were examined by FACS.

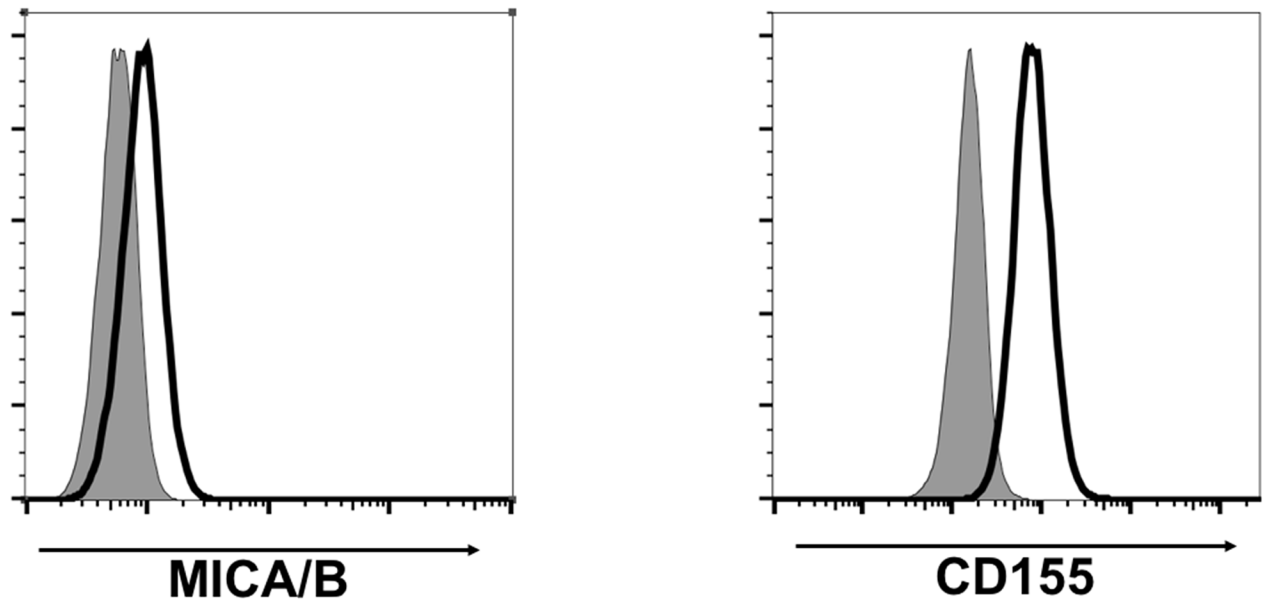

**Supplementary Figure 2: MG-63 cell line express MICA/B and CD155.** Cell surface expression of MICA/B and CD155 on MG-63 cells were examined by FACS. Tinted: isotype control, heavy line: MICA/B or CD155.
